# Supplementary material for: A polymeric 1H/19F dual-modal MRI contrast agent with a snowman-like Janus nanostructure
Source: Royal Society of Chemistry journal article supplement (doi:10.1039/d4tb00923a), 2024-01-01
Supplement: d4tb00923a1.pdf [file d4tb00923a1.pdf]

## Supporting Information

# Polymeric $^1\text{H}/^{19}\text{F}$ Dual-modal MRI Contrast Agent with Snowman-like Janus Nanostructure

Ziwei Duan<sup>1</sup>, Jialei Han<sup>1</sup>, Yadong Liu<sup>1</sup>, Xinyu Zhao<sup>1</sup>, Bo Wang<sup>1</sup>, Shuaishuai Cao<sup>2,\*</sup>, Dalin Wu<sup>1,3\*</sup>

**Table S1.** SNP synthesis condition and DLS/zeta potential characterization results.

| Name  | Reactants |         |                        |            |          | Diameter (nm) | Zeta Potential (mV) |
|-------|-----------|---------|------------------------|------------|----------|---------------|---------------------|
|       | DIMA (mL) | St (mL) | DSDA ( $\mu\text{L}$ ) | NaVBS (mg) | KPS (mg) |               |                     |
| SNP-1 | 3.6       | 0.9     | 45                     | 110        | 50       | 118 $\pm$ 36  | -54 $\pm$ 1         |
| SNP-2 | 2.25      | 2.25    | 45                     | 110        | 50       | 59 $\pm$ 17   | -45 $\pm$ 2         |
| SNP-3 | 4.5       | 0       | 45                     | 110        | 50       | 123 $\pm$ 39  | -40 $\pm$ 1         |

**Table S2.** JNP synthesis condition and DLS/zeta potential characterization results.

| Name  | Reactants |           |               | Diameter (nm) | Zeta Potential (mV) |
|-------|-----------|-----------|---------------|---------------|---------------------|
|       | SNP-1 (g) | TPMA (mL) | 3-TMSPMA (mL) |               |                     |
| JNP-1 | 0.5       | 0.3       | 0.7           | 157 $\pm$ 50  | -61 $\pm$ 2         |
| JNP-2 | 0.5       | 0.4       | 0.6           | 197 $\pm$ 71  | -22 $\pm$ 2         |
| JNP-3 | 0.5       | 0.5       | 0.5           | 331 $\pm$ 66  | -28 $\pm$ 1         |

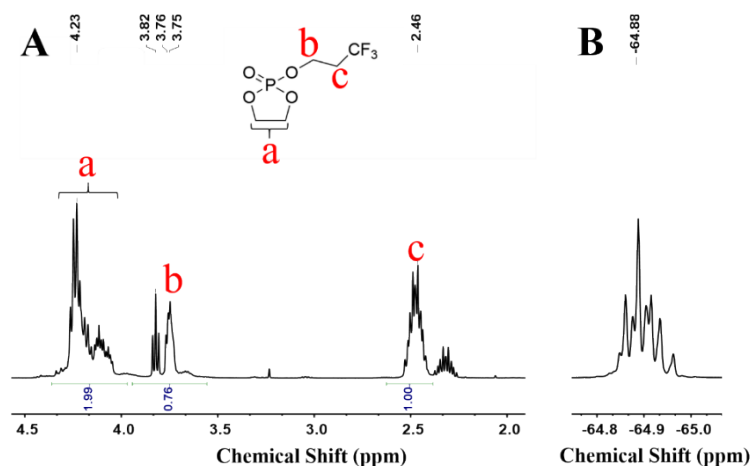

**Figure S1.** NMR spectrums of FCP in CDCl<sub>3</sub>. (A) <sup>1</sup>H NMR spectrum and (B) <sup>19</sup>F NMR spectrum.

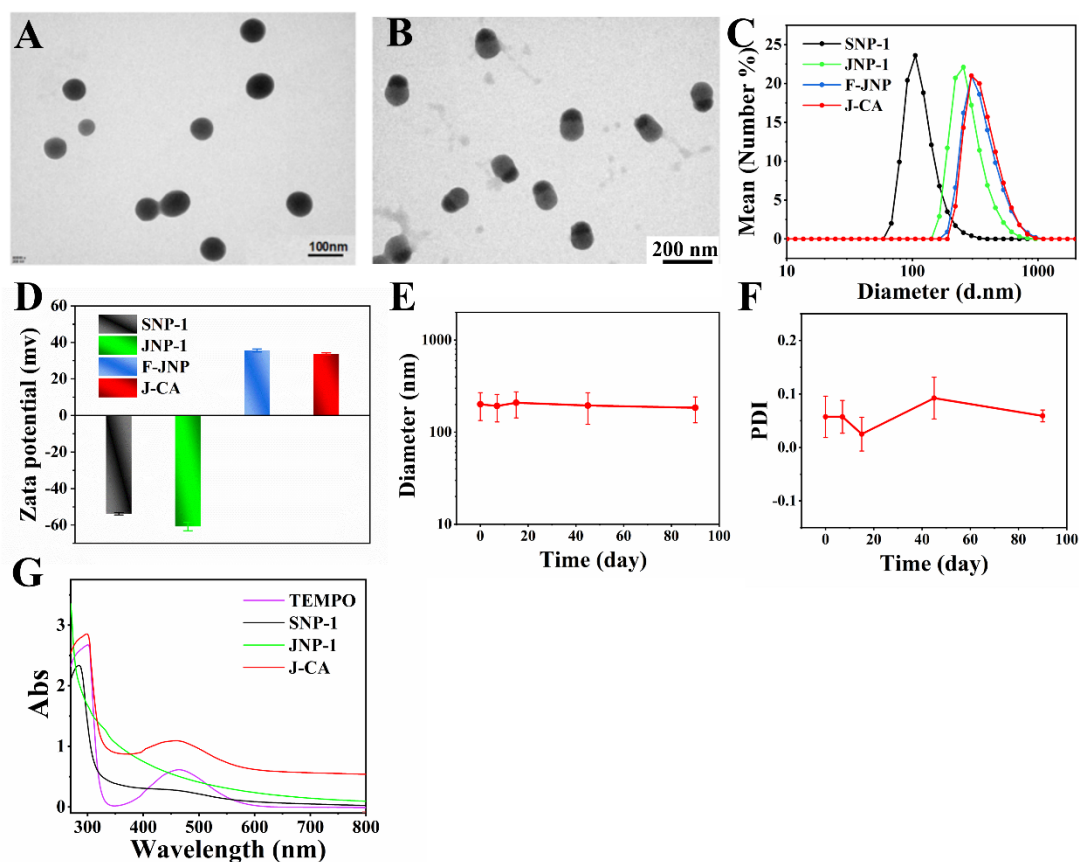

**Figure S2.** The characterization result of SNP-1, JNP-1, F-JNP and J-CA. (A) TEM image of SNP-1. (B) TEM image of JNP-1. (C) Hydrodynamic values of SNP-1, JNP-1, F-JNP and J-CA in aqueous solution. (D) Zeta potential values of SNP-1, JNP-1, F-JNP and J-CA in aqueous solution. (E) Hydrodynamic diameter values of J-CA in aqueous solution in 90 days. (F) Polydispersity values of J-CA in aqueous solution in 90 days. (G) Uv-vis spectrum of TEMPO, SNP-1, JNP-1 and J-CA in aqueous solution.

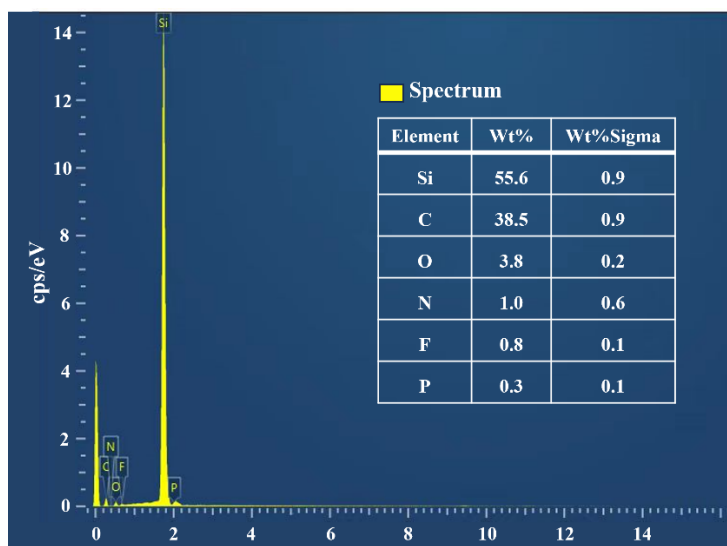

Figure S3. EDX spectrum result of J-CAs.

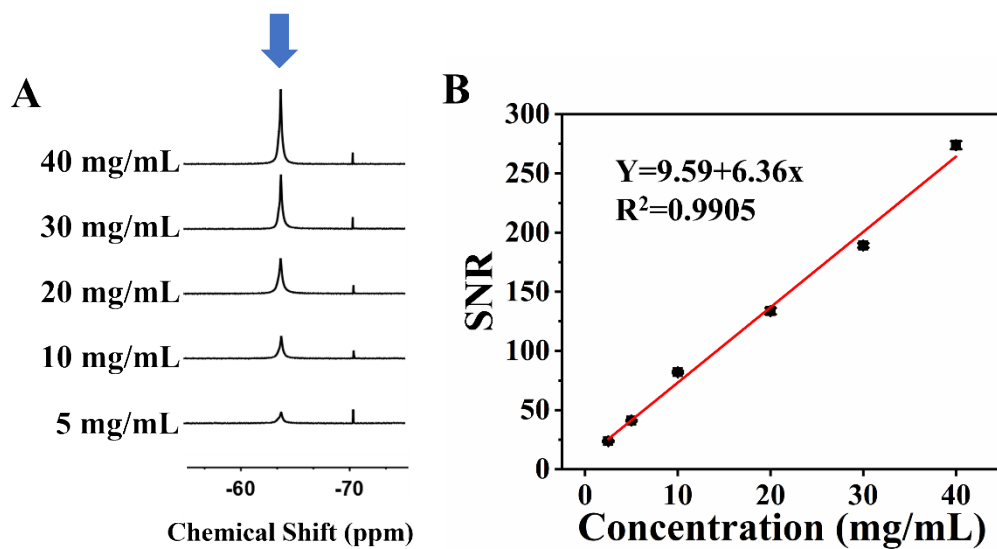

Figure S4. <sup>19</sup>F NMR spectrum of J-CA in D<sub>2</sub>O/H<sub>2</sub>O (1/9, v/v) at concentration of 5-40 mg/mL.

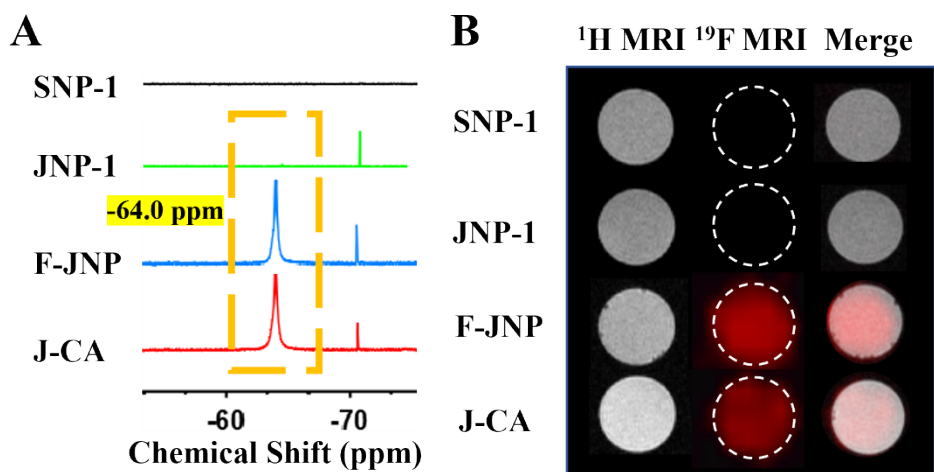

**Figure S5.** (A) <sup>19</sup>F NMR spectrum of SNP-1, JNP-1, F-JNP and J-CA in D<sub>2</sub>O/H<sub>2</sub>O (1/9, v/v) at concentration of 10 mg/mL. (B) T<sub>1</sub>-weighted <sup>1</sup>H MRI and <sup>19</sup>F “hot spot” MRI images of SNP-1, JNP-1, F-JNP and J-CA in D<sub>2</sub>O/H<sub>2</sub>O (1/9, v/v) at concentration of 20 mg/mL.

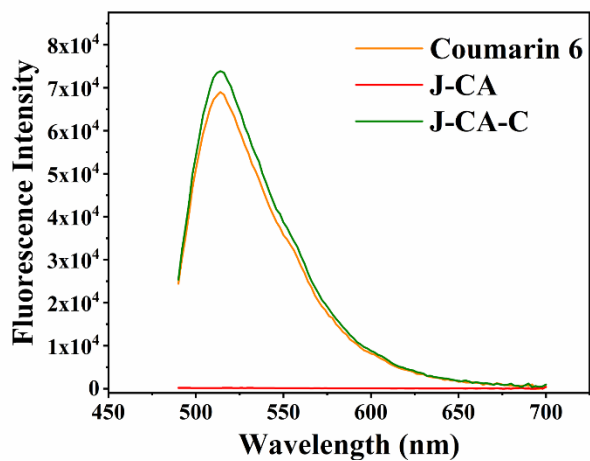

**Figure S6.** Fluorescence image of J-CA and J-CA-C in aqueous solution.

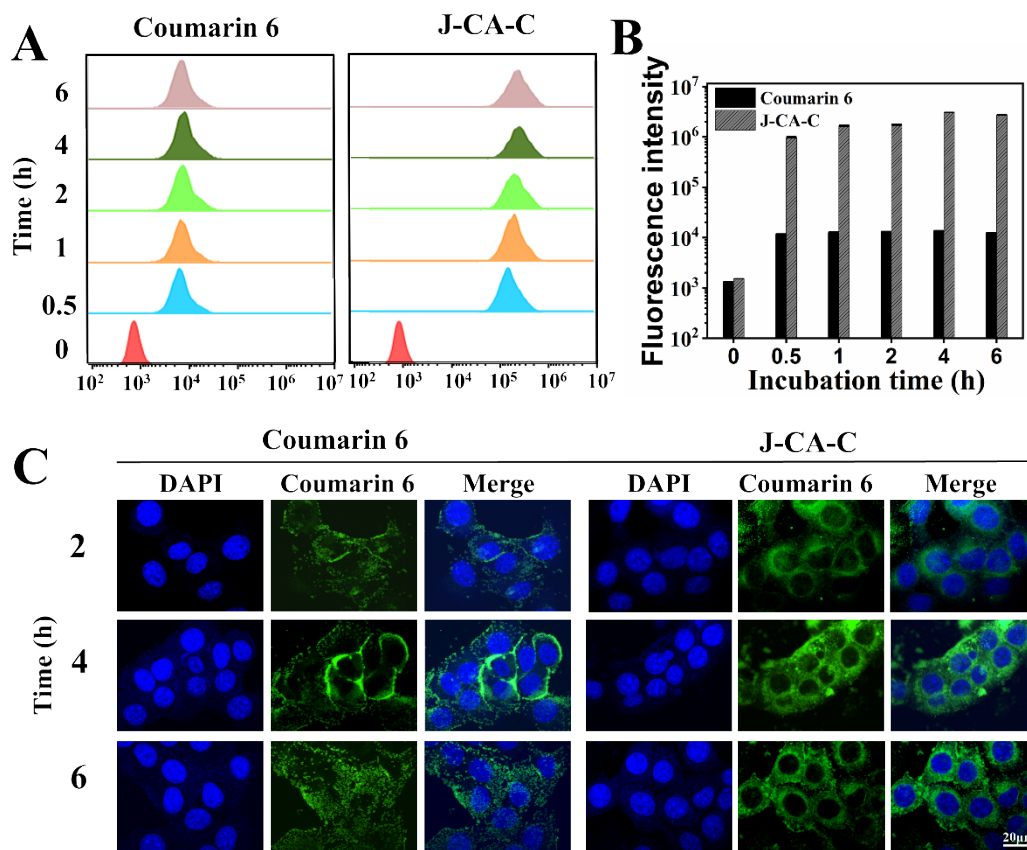

**Figure S7.** J-CA-C cell uptake behavior characterization. (A). Flow cytometry result at the time range of 0-6 h. (B) Mean fluorescence intensities of the 4T1 cell after incubation with J-CA-C at incubation time of 0-6 h. (C) CLSM images of uptake behavior of J-CA-C inside 4T1 cells at 2 h, 4 h, and 6 h post incubation.

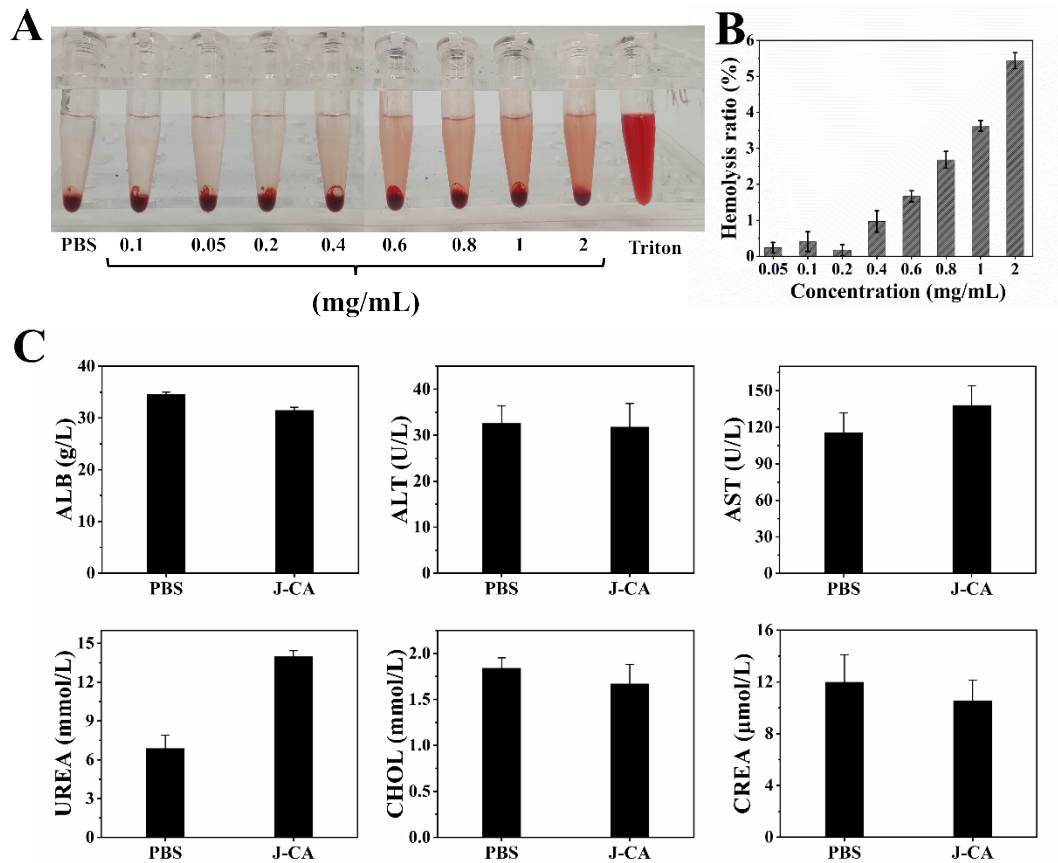

**Figure S8.** Biocompatibility characterization of J-CA. (A) Digital images of hemolysis behavior of J-CA at concentration of 0.05-2 mg/mL against HUVEC. (B) Statistic result of hemolysis ratio of J-CA at concentration of 0.05-2 mg/mL against HUVEC. (C) Physiology indices values of mice on 7 days post administrating of J-CA in mice intravenously.

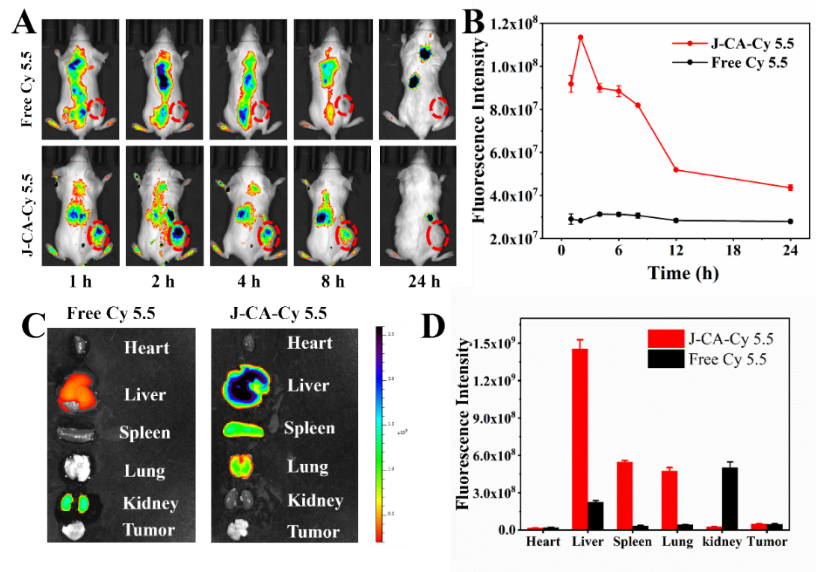

**Figure S9.** (A) *In vivo* fluorescence imaging and (B) quantification of average fluorescence intensity of tumor of 4T1 mice after vein injection of J-CA-Cy5.5 and free Cy5.5. (C) *Ex vivo* fluorescence images and (D) quantification of the fluorescent signals of 4T1 tumor and major organs of mice at 24 h post-injection.
